# Supplementary material for: Developing whole cell standards for the microbiome field
Source: PubMed Central journal article supplement (PMC9361656; doi:10.1186/s40168-022-01313-z), 2022-08-09
Supplement: 40168_2022_1313_MOESM1_ESM.pdf [file 40168_2022_1313_MOESM1_ESM.pdf]

**Supplementary data**

Supplementary Table 1: Physiochemical measures of DNA extracted from the fixed and non-fixed *E. coli* cells based on averages of three replicates.

|      | Yield (ng) |           | pairwise t-test<br>FDR adj. p-value | Integrity (DIN) |           | pairwise t-test<br>FDR adj. p-value | Purity (260/280 ratio) |           | pairwise t-test<br>FDR adj. p-value |
|------|------------|-----------|-------------------------------------|-----------------|-----------|-------------------------------------|------------------------|-----------|-------------------------------------|
|      | fixed      | non-fixed |                                     | fixed           | non-fixed |                                     | fixed                  | non-fixed |                                     |
| Kit1 | 7120       | 6740      | 0.85                                | 6.20            | 6.20      | 1                                   | 1.93                   | 1.93      | 0.996                               |
| Kit2 | 7306.7     | 8113.3    | 0.72                                | 5.63            | 5.67      | 0.91                                | 1.90                   | 1.93      | 0.996                               |
| Kit3 | 331.3      | 151.5     | 0.93                                | n/a             | n/a       | n/a                                 | n/a                    | n/a       | n/a                                 |
| Kit4 | 2060       | 3393.3    | 0.53                                | 5.90            | 6.00      | 0.75                                | 2.09                   | 2.01      | 0.923                               |
| Kit5 | 4593.3     | 2813.3    | 0.39                                | 7.17            | 7.07      | 0.75                                | 1.97                   | 2.01      | 0.996                               |
| Kit6 | 9766.7     | 10420     | 0.77                                | 7.63            | 7.67      | 0.91                                | 1.91                   | 1.90      | 0.996                               |
| Kit7 | 2713.3     | 3953.3    | 0.56                                | 6.47            | 6.80      | 0.27                                | 2.00                   | 2.00      | 0.996                               |
| Kit8 | 12373.3    | 11773.3   | 0.78                                | 5.97            | 5.87      | 0.75                                | 1.92                   | 1.91      | 0.996                               |

Supplementary Table 2: Physiochemical measures of DNA extracted from the NIBSC WC-Gut-RR before (average of three replicates) and after lyophilisation (average of five replicates)

|      | Yield (ng) |          | pairwise t-test<br>FDR adj. p-value | Integrity (DIN) |          | pairwise t-test<br>FDR adj. p-value | Purity (260/280 ratio) |          | pairwise t-test<br>FDR adj. p-value |
|------|------------|----------|-------------------------------------|-----------------|----------|-------------------------------------|------------------------|----------|-------------------------------------|
|      | Pre-lyo    | Post-lyo |                                     | Pre-lyo         | Post-lyo |                                     | Pre-lyo                | Post-lyo |                                     |
| Kit1 | 653        | 840      | 0.63                                | 4.67            | 4.12     | 0.23                                | 1.87                   | 1.98     | 0.91                                |
| Kit2 | 655        | 799      | 0.73                                | 4.93            | 4.28     | 0.17                                | 1.89                   | 1.69     | 0.65                                |
| Kit3 | 84         | 125      | 0.92                                | 1.20            | 1.45     | n/a                                 | 1.33                   | 2        | 0.03                                |
| Kit4 | 883        | 1240     | 0.39                                | 4.53            | 4.24     | 0.55                                | 2.32                   | 1.81     | 0.11                                |
| Kit5 | 499        | 628      | 0.79                                | 4.53            | 3.35     | 0.01                                | 2.04                   | 1.96     | 0.91                                |
| Kit6 | 2187       | 2462     | 0.16                                | 5.47            | 5.32     | 0.77                                | 1.99                   | 1.98     | 0.98                                |
| Kit7 | 382        | 555      | 0.66                                | 5.55            | 4.84     | 0.18                                | 1.58                   | 1.81     | 0.60                                |
| Kit8 | 1677       | 1555     | 0.77                                | 4.03            | 4.34     | 0.54                                | 1.89                   | 1.95     | 0.93                                |

Supplementary Table 3: Technical specifications of the DNA extraction kits used. Steps included in the manufacturer's manual for each kit are indicated using the symbol "+" and steps not included are indicated with "-".

|      | Kit                                       | Company                  | Specific for faeces | Beating Beads | Heat incubation | Cold incubation | Spin column purification | Filter after elution |
|------|-------------------------------------------|--------------------------|---------------------|---------------|-----------------|-----------------|--------------------------|----------------------|
| Kit1 | QIAamp PowerFecal DNA kit                 | Qiagen                   | +                   | +             | +               | +               | +                        | -                    |
| Kit2 | DNAeasyPowerSoil DNA Isolation Kit        | Qiagen                   | -                   | +             | -               | +               | +                        | -                    |
| Kit3 | QIAamp Fast DNA stool Mini Kit            | Qiagen                   | +                   | -             | +               | -               | +                        | -                    |
| Kit4 | ZymoBIOMICS DNA miniprep kit              | Zymo Research            | -                   | +             | -               | -               | +                        | +                    |
| Kit5 | GenElute™ Stool DNA Isolation Kit         | Sigma-Aldrich            | +                   | +             | -               | -               | +                        | -                    |
| Kit6 | FastDNA™ SPIN Kit for Soil                | MP Biomedicals           | -                   | +             | -               | -               | +                        | -                    |
| Kit7 | PureLink™ Microbiome DNA Purification Kit | Thermo Fisher Scientific | +                   | +             | +               | -               | +                        | -                    |
| Kit8 | DNeasy® PowerSoil® Pro Kit                | Qiagen                   | -                   | +             | -               | -               | +                        | -                    |

Supplementary Table 4: Physiochemical measures of DNA extracted from the NIBSC WC-Gut-RR after lyophilisation; average based on five replicates and the Coefficient of Variation (CV%) of DNA Yield, DNA Integrity, DNA Purity.

| Post-Lyophilisation                      |             |            |     |                 |     |                        |     |
|------------------------------------------|-------------|------------|-----|-----------------|-----|------------------------|-----|
| Kit                                      |             | Yield (ng) |     | Integrity (DIN) |     | Purity (260/280 ratio) |     |
|                                          |             | Average    | CV% | Average         | CV% | Average                | CV% |
| QIAamp PowerFecal DNA kit                | <b>Kit1</b> | 840        | 11  | 4.12            | 1   | 1.98                   | 7   |
| Dneasy PowerSoil DNA Isolation Kit       | <b>Kit2</b> | 799        | 8   | 4.28            | 4   | 1.69                   | 11  |
| QIAamp Fast DNA stool Mini Kit           | <b>Kit3</b> | 125        | 13  | 1.45            | 15  | 2                      | 31  |
| ZymoBIOMICS DNA miniprep kit             | <b>Kit4</b> | 1240       | 9   | 4.24            | 4   | 1.81                   | 3   |
| GenElute™ Stool DNA Isolation Kit        | <b>Kit5</b> | 628        | 8   | 3.35            | 45  | 1.96                   | 5   |
| FastDNA™ SPIN Kit for Soil               | <b>Kit6</b> | 2462       | 10  | 5.32            | 1   | 1.98                   | 2   |
| PureLink Microbiome DNA Purification Kit | <b>Kit7</b> | 555        | 17  | 4.84            | 15  | 1.81                   | 14  |
| DNeasy PowerSoil Pro Kit                 | <b>Kit8</b> | 1555       | 3   | 4.34            | 2   | 1.95                   | 2   |

Supplementary Table 5: FDR adjusted p-value calculated using the Kruskal-Wallis test, comparing the relative abundance of each strain in DNA-RR with those found in the WC-RR and of which DNA



Supplementary Table 7: FDR adjusted p-value calculated using Tukey HSD following ANOVA, comparing the relative abundance of Gram-negative bacteria, using DNA extracted from the different DNA extraction kits, analysed using Shotgun Sequencing and the MetaPIAn3 bioinformatics tool.

| Tukey HSD following ANOVA, FDR adjusted p-value |                |      |      |      |          |      |      |         |
|-------------------------------------------------|----------------|------|------|------|----------|------|------|---------|
|                                                 | DNA-Gut-Mix-RR | Kit1 | Kit2 | Kit3 | Kit4     | Kit5 | Kit6 | Kit7    |
| Kit1                                            | 7.09E-10       |      |      |      |          |      |      |         |
| Kit2                                            | 5.91E-11       | 0.96 |      |      |          |      |      |         |
| Kit3                                            | 0              | 0    | 0    |      |          |      |      |         |
| Kit4                                            | 1.64E-13       | 0    | 0    | 0    |          |      |      |         |
| Kit5                                            | 0              | 0    | 0    | 0.13 | 0        |      |      |         |
| Kit6                                            | 0              | 0    | 0    | 0    | 0        | 0    |      |         |
| Kit7                                            | 2.79E-05       | 0    | 0    | 0    | 3.07E-08 | 0    | 0    |         |
| Kit8                                            | 1.38E-10       | 0    | 0    | 0    | 0.056    | 0    | 0    | 0.00038 |

Supplementary Table 8: FDR adjusted p-value calculated using the Kruskal-Wallis test, comparing the relative abundance of each strain in NIBSC DNA-Gut-Mix-RR with those found in the WC-RR and of which DNA extracted from each kit, FDR adjusted p-value > 0.05 is shown in bold. The data was analysed using 16S Amplicon Sequencing and the QIIME2 (Deblur) pipeline.

| 16S Amplicon Sequencing / QIIME2 – Deblur |              |              |              |              |              |              |              |              |
|-------------------------------------------|--------------|--------------|--------------|--------------|--------------|--------------|--------------|--------------|
| Taxonomy                                  | Kit1         | Kit2         | Kit3         | Kit4         | Kit5         | Kit6         | Kit7         | Kit8         |
| <i>Akkermansia</i>                        | <b>0.031</b> | <b>0.029</b> | <b>0.027</b> | 0.456        | <b>0.029</b> | <b>0.029</b> | 0.205        | 0.486        |
| <i>Alistipes</i>                          | <b>0.031</b> | <b>0.029</b> | <b>0.027</b> | <b>0.034</b> | <b>0.029</b> | <b>0.029</b> | <b>0.031</b> | <b>0.031</b> |
| <i>Anaerostipes</i>                       | <b>0.031</b> | <b>0.029</b> | <b>0.027</b> | <b>0.034</b> | 0.297        | 0.192        | <b>0.031</b> | <b>0.031</b> |
| <i>Bacteroides</i>                        | <b>0.031</b> | <b>0.029</b> | <b>0.027</b> | <b>0.034</b> | <b>0.029</b> | <b>0.029</b> | <b>0.031</b> | <b>0.031</b> |
| <i>Bifidobacterium</i>                    | <b>0.031</b> | <b>0.029</b> | <b>0.027</b> | 0.456        | <b>0.029</b> | <b>0.029</b> | 0.486        | 0.655        |
| <i>Blautia</i>                            | <b>0.031</b> | <b>0.029</b> | <b>0.027</b> | <b>0.034</b> | <b>0.029</b> | <b>0.029</b> | <b>0.031</b> | <b>0.031</b> |
| <i>Clostridium</i>                        | <b>0.031</b> | <b>0.029</b> | <b>0.027</b> | <b>0.034</b> | <b>0.029</b> | <b>0.029</b> | <b>0.031</b> | <b>0.031</b> |
| <i>Collinsella</i>                        | <b>0.031</b> | <b>0.029</b> | <b>0.027</b> | <b>0.034</b> | <b>0.029</b> | <b>0.029</b> | <b>0.031</b> | <b>0.031</b> |
| <i>Escherichia</i>                        | <b>0.031</b> | <b>0.029</b> | <b>0.027</b> | <b>0.034</b> | <b>0.029</b> | <b>0.029</b> | 0.881        | <b>0.031</b> |
| <i>Eubacterium</i>                        | <b>0.031</b> | <b>0.029</b> | <b>0.027</b> | <b>0.034</b> | <b>0.029</b> | <b>0.029</b> | <b>0.031</b> | <b>0.031</b> |
| <i>Faecalibacterium</i>                   | <b>0.031</b> | <b>0.029</b> | <b>0.027</b> | 0.205        | <b>0.029</b> | <b>0.029</b> | <b>0.031</b> | <b>0.031</b> |
| <i>Lactobacillus</i>                      | 0.316        | <b>0.029</b> | <b>0.027</b> | 0.124        | <b>0.029</b> | <b>0.029</b> | <b>0.031</b> | 0.339        |
| <i>Parabacteroides</i>                    | <b>0.031</b> | <b>0.029</b> | <b>0.027</b> | <b>0.034</b> | <b>0.029</b> | <b>0.029</b> | <b>0.031</b> | <b>0.031</b> |
| <i>Prevotella</i>                         | <b>0.031</b> | <b>0.029</b> | 0.053        | <b>0.034</b> | <b>0.029</b> | <b>0.029</b> | <b>0.031</b> | <b>0.031</b> |
| <i>Roseburia</i>                          | 0.881        | 0.655        | <b>0.027</b> | <b>0.034</b> | <b>0.029</b> | <b>0.029</b> | <b>0.031</b> | <b>0.031</b> |
| <i>Ruminococcus</i>                       | 0.316        | 0.316        | <b>0.027</b> | <b>0.034</b> | 0.192        | 0.655        | <b>0.031</b> | <b>0.031</b> |

Supplementary Table 9: P-value calculated via PERMANOVA, comparing the b-diversity (Bray-Curtis matrix) of the samples. The data was generated using 16S Amplicon Sequencing and the QIIME2 (Deblur) pipeline.

| PERMANOVA, p-value |                |       |       |       |       |       |       |       |
|--------------------|----------------|-------|-------|-------|-------|-------|-------|-------|
|                    | DNA-Gut-Mix-RR | Kit1  | Kit2  | Kit3  | Kit4  | Kit5  | Kit6  | Kit7  |
| Kit1               | 0.025          |       |       |       |       |       |       |       |
| Kit2               | 0.031          | 0.105 |       |       |       |       |       |       |
| Kit3               | 0.034          | 0.022 | 0.025 |       |       |       |       |       |
| Kit4               | 0.031          | 0.022 | 0.022 | 0.022 |       |       |       |       |
| Kit5               | 0.030          | 0.022 | 0.022 | 0.022 | 0.022 |       |       |       |
| Kit6               | 0.025          | 0.022 | 0.024 | 0.022 | 0.022 | 0.022 |       |       |
| Kit7               | 0.03           | 0.022 | 0.022 | 0.022 | 0.022 | 0.022 | 0.022 |       |
| Kit8               | 0.022          | 0.022 | 0.022 | 0.022 | 0.545 | 0.022 | 0.022 | 0.022 |

Supplementary Table 10: FDR adjusted p-value calculated using Tukey HSD following ANOVA, comparing the relative abundance of Gram-negative bacteria, using DNA extracted from the different DNA extraction kits, analysed using Shotgun Sequencing and the MetaPIAn3 bioinformatics tool.

| Tukey HSD following ANOVA, FDR adjusted p-value |                |          |          |       |          |         |      |         |
|-------------------------------------------------|----------------|----------|----------|-------|----------|---------|------|---------|
|                                                 | DNA-Gut-Mix-RR | Kit1     | Kit2     | Kit3  | Kit4     | Kit5    | Kit6 | Kit7    |
| Kit1                                            | 0.041          |          |          |       |          |         |      |         |
| Kit2                                            | 0.015          | 0.9999   |          |       |          |         |      |         |
| Kit3                                            | 0              | 0        | 0        |       |          |         |      |         |
| Kit4                                            | 8.15E-05       | 1.4E-10  | 4.45E-11 | 0     |          |         |      |         |
| Kit5                                            | 0              | 0        | 0        | 0.023 | 0        |         |      |         |
| Kit6                                            | 0              | 2.67E-13 | 8.02E-13 | 0.017 | 0        | 5.2E-07 |      |         |
| Kit7                                            | 1              | 0.0053   | 0.0014   | 0     | 1.38E-05 | 0       | 0    |         |
| Kit8                                            | 0.00074        | 1.32E-09 | 3.96E-10 | 0     | 0.993    | 0       | 0    | 0.00018 |

Supplementary Table 11: FDR adjusted p-value calculated using Tukey HSD following ANOVA, comparing the relative abundance of Gram-positive bacteria, using DNA extracted from the different DNA extraction kits, using five different mock communities; NIBSC WC-RR, ZYMO, ATCC-MSA 2002,

ATCC-MSA 2003, ATCC-MSA 2006. The data was generated using Shotgun Sequencing and the MetaPIAn3 bioinformatics tool.

| NIBSC WC-RR    |      |          |          | ZYMO |          |          |
|----------------|------|----------|----------|------|----------|----------|
|                | Kit2 | Kit6     | Kit7     |      | Kit6     | Kit7     |
| DNA-Gut-Mix-RR | 1    | 8.03E-05 | 0.000226 | Kit2 | 0.073592 | 4.9E-13  |
| Kit2           |      | 9.41E-05 | 0.000193 | Kit6 |          | 1.01E-13 |
| Kit6           |      |          | 3.6E-11  |      |          |          |

  

| ATCC-MSA 2002 |         |          | ATCC-MSA 2003 |          |          | ATCC-MSA 2006 |          |          |
|---------------|---------|----------|---------------|----------|----------|---------------|----------|----------|
|               | Kit6    | Kit7     |               | Kit6     | Kit7     |               | Kit6     | Kit7     |
| Kit2          | 0.38887 | 3.01E-13 | Kit2          | 0.977396 | 1.19E-06 | Kit2          | 4.63E-05 | 1.04E-13 |
| Kit6          |         | 1.02E-13 | Kit6          |          | 7.19E-05 | Kit6          |          | 1.35E-09 |

Supplementary Table 12: Composition of commercial reagents used in this study.

| ATCC-MSA 2002                       |                 |             |
|-------------------------------------|-----------------|-------------|
| Species                             | Composition (%) | Gram status |
| <i>Acinetobacter baumannii</i>      | 5               | -           |
| <i>Actinomyces odontolyticus</i>    | 5               | +           |
| <i>Bacillus cereus</i>              | 5               | +           |
| <i>Bacteroides vulgatus</i>         | 5               | -           |
| <i>Bifidobacterium adolescentis</i> | 5               | +           |
| <i>Clostridium beijerinckii</i>     | 5               | +           |
| <i>Cutibacterium acnes</i>          | 5               | +           |
| <i>Deinococcus radiodurans</i>      | 5               | +           |
| <i>Enterococcus faecalis</i>        | 5               | +           |
| <i>Escherichia coli</i>             | 5               | -           |
| <i>Helicobacter pylori</i>          | 5               | -           |
| <i>Lactobacillus gasseri</i>        | 5               | +           |
| <i>Neisseria meningitidis</i>       | 5               | -           |
| <i>Porphyromonas gingivalis</i>     | 5               | -           |
| <i>Pseudomonas aeruginosa</i>       | 5               | -           |
| <i>Rhodobacter sphaeroides</i>      | 5               | -           |
| <i>Staphylococcus aureus</i>        | 5               | +           |
| <i>Staphylococcus epidermidis</i>   | 5               | +           |
| <i>Streptococcus agalactiae</i>     | 5               | +           |
| <i>Streptococcus mutans</i>         | 5               | +           |
| ATCC-MSA 2003                       |                 |             |
| Species                             | Composition (%) | Gram status |
| <i>Bacillus cereus</i>              | 10              | +           |
| <i>Bifidobacterium adolescentis</i> | 10              | +           |
| <i>Clostridium beijerinckii</i>     | 10              | +           |
| <i>Deinococcus radiodurans</i>      | 10              | +           |
| <i>Enterococcus faecalis</i>        | 10              | +           |
| <i>Escherichia coli</i>             | 10              | -           |
| <i>Lactobacillus gasseri</i>        | 10              | +           |
| <i>Rhodobacter sphaeroides</i>      | 10              | -           |
| <i>Staphylococcus epidermidis</i>   | 10              | +           |
| <i>Streptococcus mutans</i>         | 10              | +           |
| ATCC-MSA 2006                       |                 |             |
| Species                             | Composition (%) | Gram status |
| <i>Bacteroides fragilis</i>         | 8.3             | -           |
| <i>Bacteroides vulgatus</i>         | 8.3             | -           |
| <i>Bifidobacterium adolescentis</i> | 8.3             | +           |
| <i>Clostridioides difficile</i>     | 8.3             | +           |
| <i>Enterococcus faecalis</i>        | 8.3             | +           |
| <i>Escherichia coli</i>             | 8.3             | -           |
| <i>Fusobacterium nucleatum</i>      | 8.3             | -           |
| <i>Helicobacter pylori</i>          | 8.3             | -           |
| <i>Lactobacillus plantarum</i>      | 8.3             | +           |
| <i>Salmonella enterica</i>          | 8.3             | -           |
| <i>Yersinia enterocolitica</i>      | 8.3             | -           |
| <i>Enterobacter cloacae</i>         | 8.3             | -           |
| ZYMO                                |                 |             |
| Species                             | Composition (%) | Gram status |
| <i>Bacillus intestinalis</i>        | 12              | +           |
| <i>Enterococcus faecalis</i>        | 12              | +           |
| <i>Escherichia coli</i>             | 12              | -           |
| <i>Lactobacillus fermentum</i>      | 12              | +           |
| <i>Listeria monocytogenes</i>       | 12              | +           |
| <i>Pseudomonas aeruginosa</i>       | 12              | -           |
| <i>Salmonella enterica</i>          | 12              | -           |
| <i>Staphylococcus aureus</i>        | 12              | +           |
