# Supplementary material for: Developing whole cell standards for the microbiome field
Source: PubMed Central journal article supplement (PMC9361656; doi:10.1186/s40168-022-01313-z), 2022-08-09
Supplement: 40168_2022_1313_MOESM3_ESM.pdf [file 40168_2022_1313_MOESM3_ESM.pdf]

### A Shotgun Sequencing / MetaPIAn3

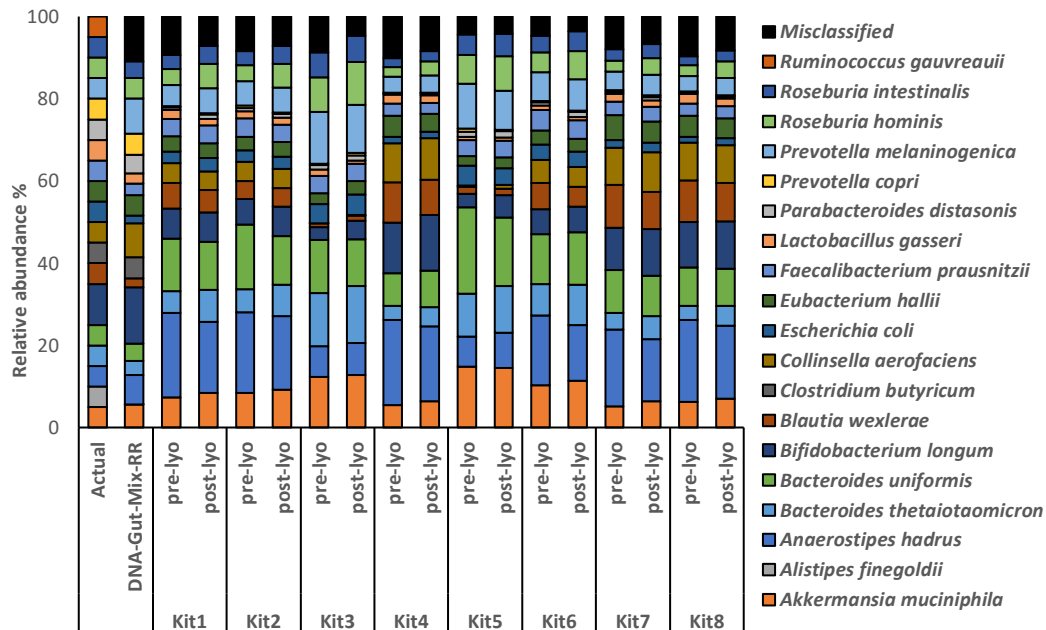

### B

| MetaPIAn3 | Similarity % |
|-----------|--------------|
| Kit1      | 91.6         |
| Kit2      | 92.4         |
| Kit3      | 92.8         |
| Kit4      | 93.4         |
| Kit5      | 92.5         |
| Kit6      | 92.1         |
| Kit7      | 92.1         |
| Kit8      | 94.3         |

### C

#### 16S Amplicon Sequencing / QIIME2 - Deblur

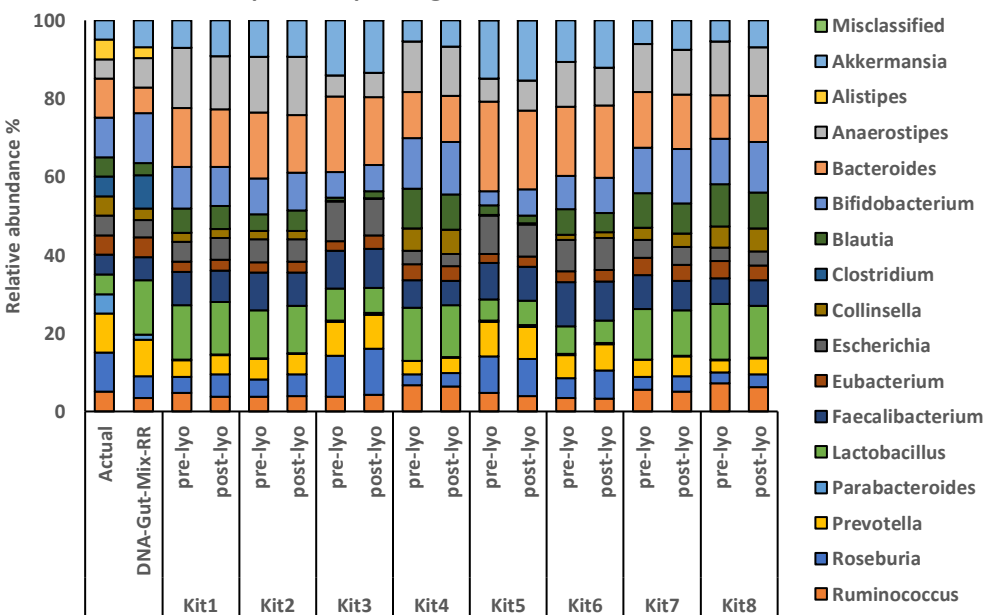

### D

| 16S  | Similarity % |
|------|--------------|
| Kit1 | 94.7         |
| Kit2 | 96.3         |
| Kit3 | 94.8         |
| Kit4 | 96.7         |
| Kit5 | 93.1         |
| Kit6 | 94.0         |
| Kit7 | 94.4         |
| Kit8 | 94.5         |
