# Supplementary material for: Developing whole cell standards for the microbiome field
Source: PubMed Central journal article supplement (PMC9361656; doi:10.1186/s40168-022-01313-z), 2022-08-09
Supplement: 40168_2022_1313_MOESM4_ESM.pdf [file 40168_2022_1313_MOESM4_ESM.pdf]

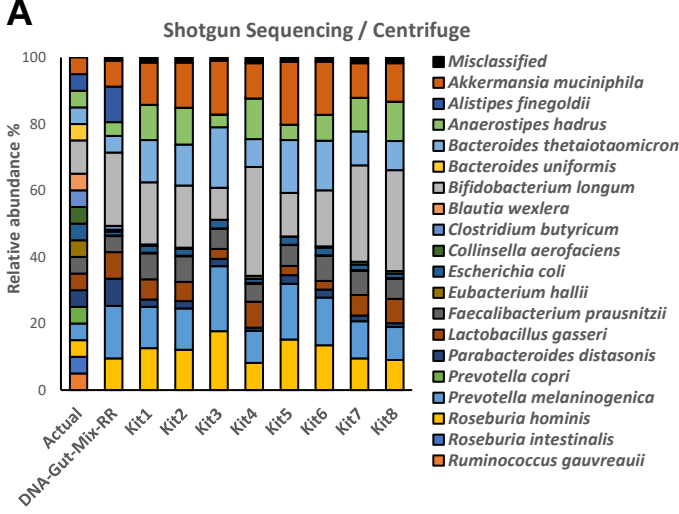

|                | Sensitivity | FPRA | Diversity | Similarity to Actual | Similarity to DNA-Gut-Mix-RR |
|----------------|-------------|------|-----------|----------------------|------------------------------|
| Actual         | 100         | 0.0  | 19        | 100                  | 60                           |
| DNA-Gut-Mix-RR | 79          | 0.9  | 38        | 60                   | 100                          |
| Kit1           | 74          | 1.6  | 42        | 50                   | 73                           |
| Kit2           | 74          | 1.5  | 42        | 50                   | 73                           |
| Kit3           | 74          | 0.9  | 36        | 46                   | 63                           |
| Kit4           | 74          | 1.7  | 45        | 48                   | 73                           |
| Kit5           | 74          | 1.3  | 37        | 48                   | 68                           |
| Kit6           | 74          | 1.3  | 40        | 48                   | 70                           |
| Kit7           | 74          | 1.7  | 45        | 50                   | 75                           |
| Kit8           | 74          | 1.7  | 45        | 49                   | 74                           |

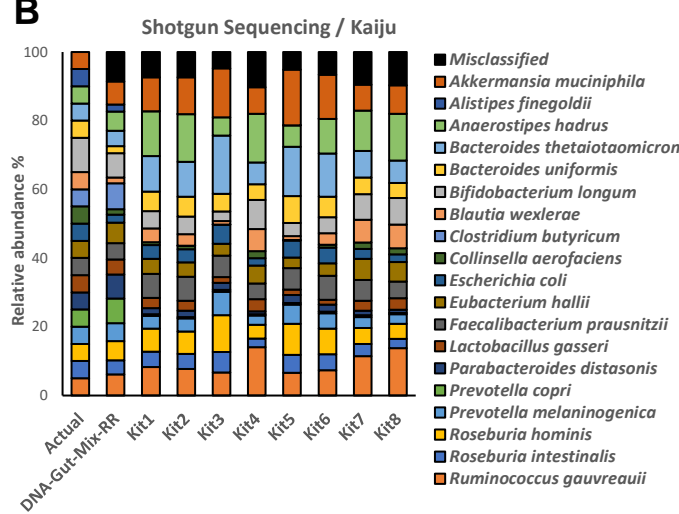

|                | Sensitivity | FPRA | Diversity | Similarity to Actual | Similarity to DNA-Gut-Mix-RR |
|----------------|-------------|------|-----------|----------------------|------------------------------|
| Actual         | 100         | 0.0  | 19        | 100                  | 71                           |
| DNA-Gut-Mix-RR | 100         | 8.6  | 207       | 71                   | 100                          |
| Kit1           | 95          | 7.4  | 196       | 65                   | 69                           |
| Kit2           | 100         | 7.4  | 200       | 64                   | 69                           |
| Kit3           | 89          | 4.8  | 167       | 61                   | 62                           |
| Kit4           | 89          | 10.3 | 202       | 61                   | 69                           |
| Kit5           | 95          | 5.1  | 169       | 62                   | 65                           |
| Kit6           | 95          | 6.7  | 184       | 64                   | 67                           |
| Kit7           | 89          | 9.5  | 197       | 65                   | 73                           |
| Kit8           | 89          | 9.7  | 198       | 62                   | 70                           |

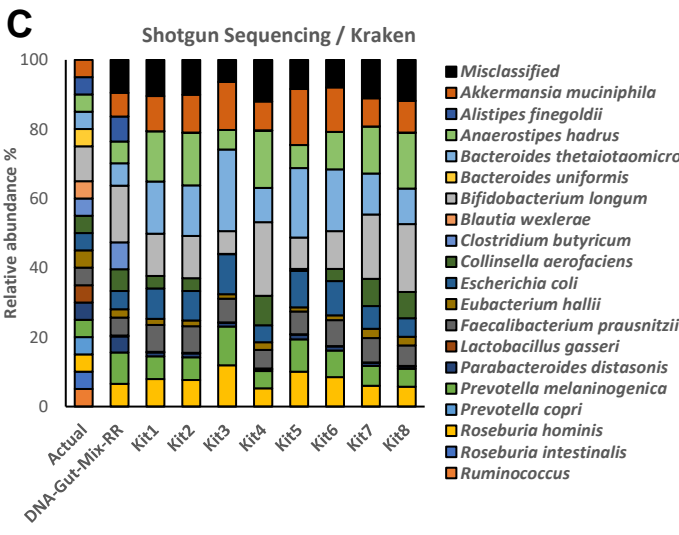

|                | Sensitivity | FPRA | Diversity | Similarity to Actual | Similarity to DNA-Gut-Mix-RR |
|----------------|-------------|------|-----------|----------------------|------------------------------|
| Actual         | 100         | 0.0  | 19        | 100                  | 68                           |
| DNA-Gut-Mix-RR | 74          | 9.5  | 84        | 68                   | 100                          |
| Kit1           | 68          | 10.5 | 82        | 56                   | 69                           |
| Kit2           | 68          | 10.1 | 82        | 56                   | 69                           |
| Kit3           | 68          | 6.5  | 68        | 47                   | 59                           |
| Kit4           | 68          | 12.0 | 86        | 55                   | 75                           |
| Kit5           | 68          | 8.5  | 70        | 50                   | 63                           |
| Kit6           | 68          | 8.0  | 79        | 55                   | 66                           |
| Kit7           | 68          | 11.1 | 84        | 59                   | 77                           |
| Kit8           | 68          | 11.9 | 84        | 56                   | 77                           |

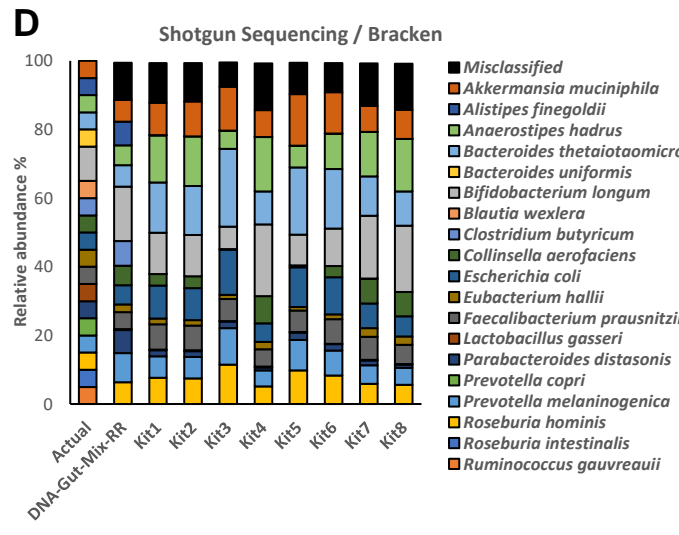

|                | Sensitivity | FPRA | Diversity | Similarity to Actual | Similarity to DNA-Gut-Mix-RR |
|----------------|-------------|------|-----------|----------------------|------------------------------|
| Actual         | 100         | 0.0  | 19        | 100                  | 66                           |
| DNA-Gut-Mix-RR | 74          | 10.9 | 94        | 66                   | 100                          |
| Kit1           | 74          | 11.6 | 91        | 52                   | 69                           |
| Kit2           | 68          | 11.3 | 90        | 52                   | 69                           |
| Kit3           | 68          | 7.1  | 72        | 45                   | 59                           |
| Kit4           | 68          | 13.7 | 95        | 53                   | 73                           |
| Kit5           | 68          | 9.1  | 78        | 48                   | 63                           |
| Kit6           | 68          | 8.6  | 87        | 52                   | 66                           |
| Kit7           | 74          | 12.4 | 95        | 54                   | 74                           |
| Kit8           | 68          | 13.5 | 93        | 54                   | 74                           |
